# Supplementary material for: Demic and cultural diffusion propagated the Neolithic transition across different regions of Europe
Source: PubMed Central journal article supplement (PMC4424695; doi:10.1098/rsif.2015.0166), 2015-05-06
Supplement: rsif20150166supp4.pdf [file rsif20150166supp4.pdf]

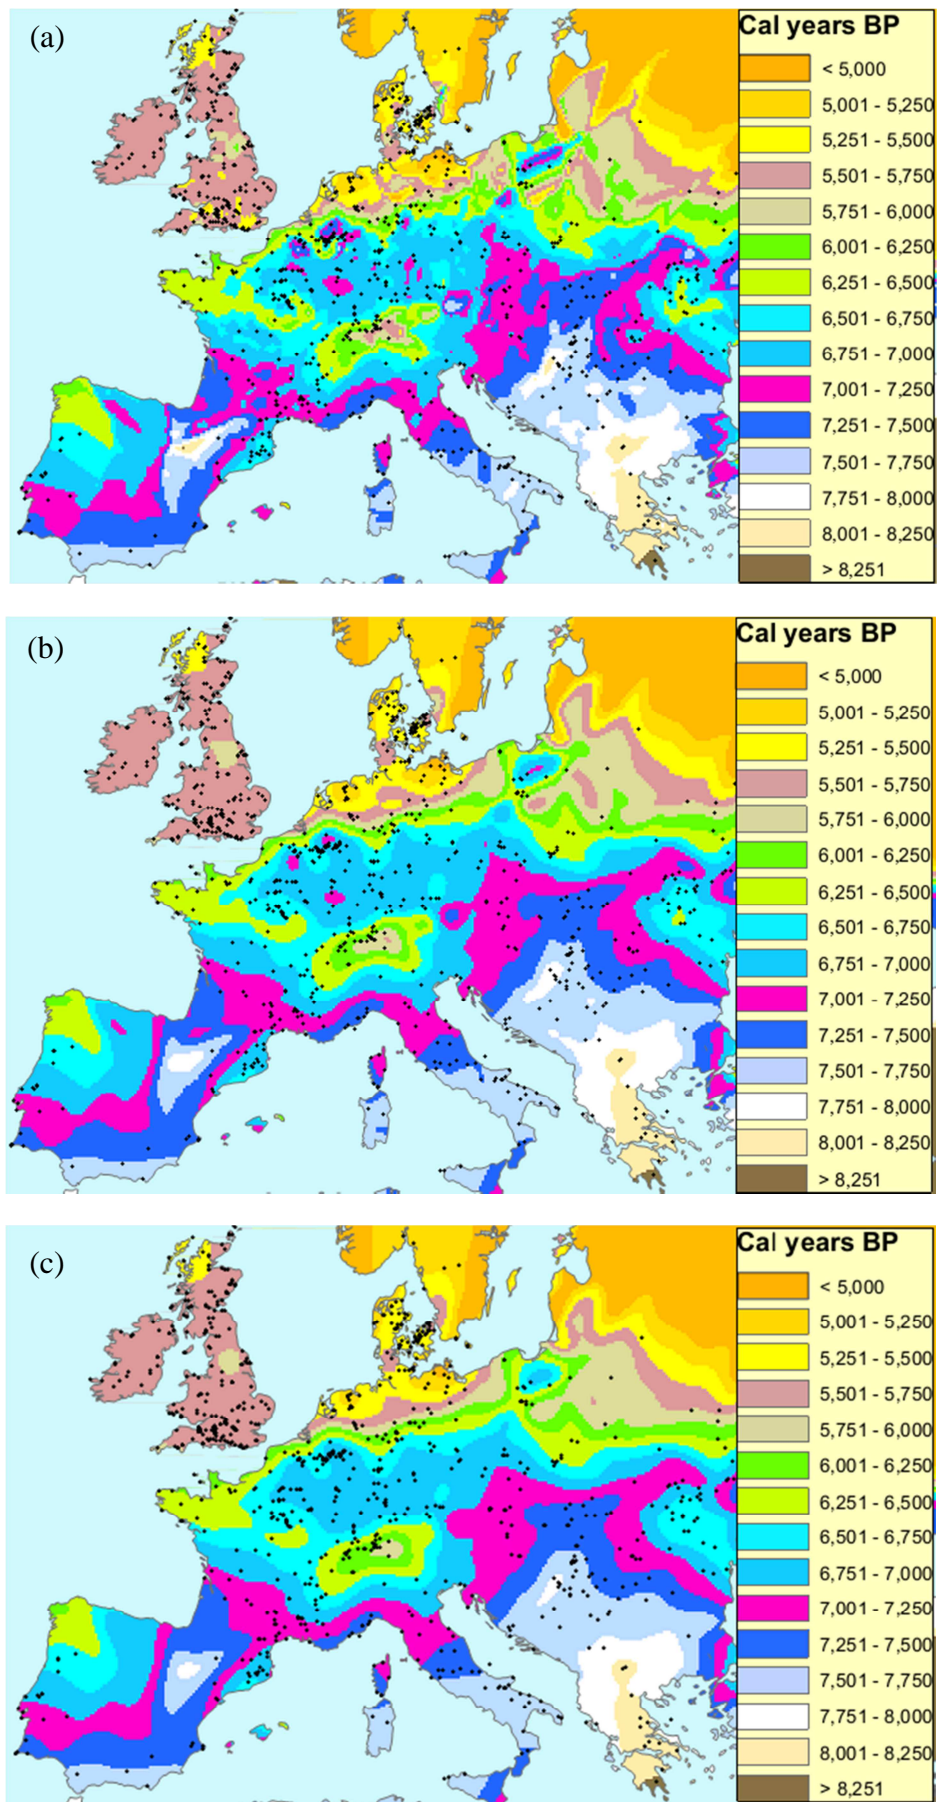

Fig. S3
